## Correction: From the core to beyond the margin: a genomic picture of glioblastoma intratumor heterogeneity

Marc Aubry, Marie de Tayrac, Amandine Etcheverry, Anne Clavreul, Stéphan Saikali, Philippe Menei, Jean Mosser

**Present:** Due to an error made in manuscript preparation, the microarray data was ascribed to the wrong repository institutions.

**Correct:** The correct repository assignments are provided below. The authors sincerely apologize for this oversight.

Original article: Oncotarget. 2015; 6(14):12094-109. doi: 10.18632/oncotarget.3297.

The repository information should be amended as follows:

‘Copy number arrays have been deposited in the ArrayExpress repository under the accession number E-MTAB-5098’.

‘Expression arrays have been deposited in the ArrayExpress repository under the accession number E-MTAB-5092’

‘Methylation arrays have been deposited in the ArrayExpress repository under the accession number E-MTAB-5109’
